# Supplementary material
Source: Springer Nature journal article supplement (https://www.springermedizin.de/resource/supplementary/12875_2013_928_MOESM1_ESM.pdf/9435420)
Supplement: MOESM1 [file 9435420]

### Medline search strategy

|                                     |
|-------------------------------------|
| 1. *Cooperative Behavior/           |
| 2. *Partnership Practice/           |
| 3. *Physician-Nurse Relations/      |
| 4. *Interprofessional Relations/    |
| 5. *Nurse Practitioners/            |
| 6. *"Attitude of Health Personnel"/ |
| 7. "collaborative practice".ab,ti.  |
| 8. collaboration.ab,ti.             |
| 9. "nurse practitioner?".ab,ti.     |
| 10. 1 or 2 or 3 or 4 or 7 or 8      |
| 11. 5 or 9                          |
| 12. 10 and 11                       |
| 13. 6 and 11                        |
| 14. 12 or 13                        |
